# Supplementary material for: Cytosolic sulfotransferase 1A1 regulates HIV-1 minus-strand DNA elongation in primary human monocyte-derived macrophages
Source: Virol J. 2016 Feb 24;13:30. doi: 10.1186/s12985-016-0491-9 (PMC4765207; doi:10.1186/s12985-016-0491-9)
Supplement: Additional file 2: Table S1. — Primer and siRNA sequences. DNA and RNA primer sequences used in the study are listed from 5′ to 3′. siRNAs are listed with the siRNA name, Qiagen ID, and sequences from 5′ to 3′. (XLSX 43 kb) [file 12985_2016_491_MOESM2_ESM.xlsx]

## Sheet: Sheet1
Primer List
DNA Primers
Primer name	sequence 5' --> 3'
ERT- F	GTGCCCGTCTGTTGTGTGAC
ERT- R	GGCGCCACTGCTAGAGATTT
U3- F	ATCGAGCTTGCTACAAGGGA
R- R	TGAGGCTTAAGCAGTGGGTT
2KB- F	GACGGTACAGGCCAGACAAT
2KB- R	GATGCCCCAGACTGTGAGTT
4KB- F	GATACTTGGGCAGGAGTGGA
4KB- R	TCCTCTGTCGAGTAACGCCT
8KB- F	CTCATAGAAATCTGCGGACA
8KB- R	TGCAGCCAATCTGAGTCAAC
LRT- F	TGTGTGCCCGTCTGTTGTGT
LRT- R	GAGTCCTGCGTCGAGAGATC
PBGD- F	AAGGGATTCACTCAGGCTCTTTC
PBGD- R	GGCATGTTCAAGCTCCTTGG
DNA Probes
Probe Name	5' label	3'label	sequence 5'-->3'
ERT2	FAM	TAMRA	CTAGAGATCCCTCAGACCCTTTTAGTCAGTGTGG
LRT-P	FAM	TAMRA	CAGTGGCGCCCGAACAGGGA
PBGD-VIC	VIC	MGBNFQ	CCGGCAGATTGGAGAGAAAAGCCTGT
RNA Primers
Primer Name	sequence 5'-->3'
HIV-1 MS RNA- F	GCTCATCAGAACAGTCAGACTCATC
HIV-1 MS RNA- R	TTCTATTCCTTCGGGCCTGTC
GAPDH- F	CATGAGAAGTATGACAACAGCCT
GAPDH- R	AGTCCTTCCACGATACCAAAGT
siRNA sequences
Name	Qiagen ID	Sequence
SULT1A1 1	Sult1A1_5	ACCAAGCGGCTCAAGAATAAA
SULT1A1 2	Sult1A1_6	GAGAAGTTCATGGTCGGAGAA
SULT1A1 3	Sult1A1_7	GACCGTGGACTTCGTGGTTCA
ASN control	AllStars Negative	proprietary to Qiagen
